# Supplementary material for: Seasonal variation of mercury concentration of ancient olive groves of Lebanon
Source: Copernicus journal article supplement (doi:10.5194/bg-20-619-2023), 2023-02-06
Supplement: Supplementary file 2 [file bg-20-619-2023-supplement.zip]

Archive with 3 entries (3 files):
- Table S2-Synthesis of studies.xlsx
- bg-20-619-2023-supplement-title-page.pdf
- Supplementary Information.pdf
