# Supplementary material for: Seasonal variation of mercury concentration of ancient olive groves of Lebanon
Source: Copernicus journal article supplement (doi:10.5194/bg-20-619-2023), 2023-02-06
Supplement: Supplementary file 2 [file bg-20-619-2023-supplement.zip › bg-20-619-2023-supplement-title-page.pdf]

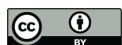

## *Supplement of*

# **Seasonal variation of mercury concentration of ancient olive groves of Lebanon**

**Nagham Tabaja et al.**

*Correspondence to:* Ilham Bentaleb ([ilham.bentaleb@umontpellier.fr](mailto:ilham.bentaleb@umontpellier.fr))

- [bg-20-619-2023-supplement-title-page.pdf](#)
- [Supplementary Information.pdf](#)
- [Table S2-Synthesis of studies.xlsx](#)

The copyright of individual parts of the supplement might differ from the article licence.
